# Supplementary material for: Multicenter assessment of shotgun metagenomics for pathogen detection
Source: PubMed Central journal article supplement — eBioMedicine. 2021 Nov 20;74:103649. doi: 10.1016/j.ebiom.2021.103649 (PMC8608867; doi:10.1016/j.ebiom.2021.103649), 2021-11-20

# Report of Human Cell Line Authentication

## I . Sample

Sample Name: labeled as 'Hela'

## II . Method and Procedure

1. PCR is amplified with STR Multi-amplification Kit (PowerPlex 21 System);
2. PCR products are assayed with 3100 DNA Analyzer (Applied Biosystems®).
3. Amplification of gene COX1 and electrophoresis are employed to survey the species of the sample.

## III. Results

1. The STR profiles of the cell line sample are in the attached table and figure.
2. The search result in ATCC and DSMZ databases.
3. The electrophoresis figure of gene COX1.

Hela: ①1 loci has tri-alleles. Contamination of other human cell lines are not found (Figure 1 & Table 1). ②Compared the STR data of Hela cell line in the databases of ATCC and DSMZ, the alleles of Hela were 94% matched with the alleles of Hela cells found in both cell banks (Figure 2&3). ③The sample is a human cell line. Contamination of other species cells are not found in the sample (Figure 4).

To all above, the sample is a single cell line, and it is derived from a common ancestry with Hela cell line.

Operator: Xiaohua Mo

Auditor: Xuanyi Liang

Guangzhou Cellcook Biotech Co., Ltd

(Notice: This authentication report is restricted to the cell sold from Guangzhou Cellcook Biotech Co., Ltd, and the date with seal is the date of delivery. )

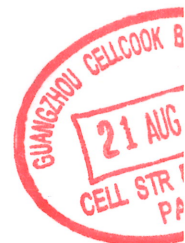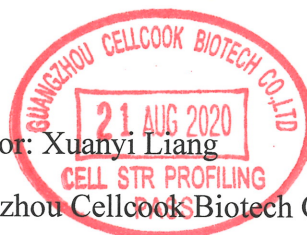

Figure 1. STR profiles of Hela cell line

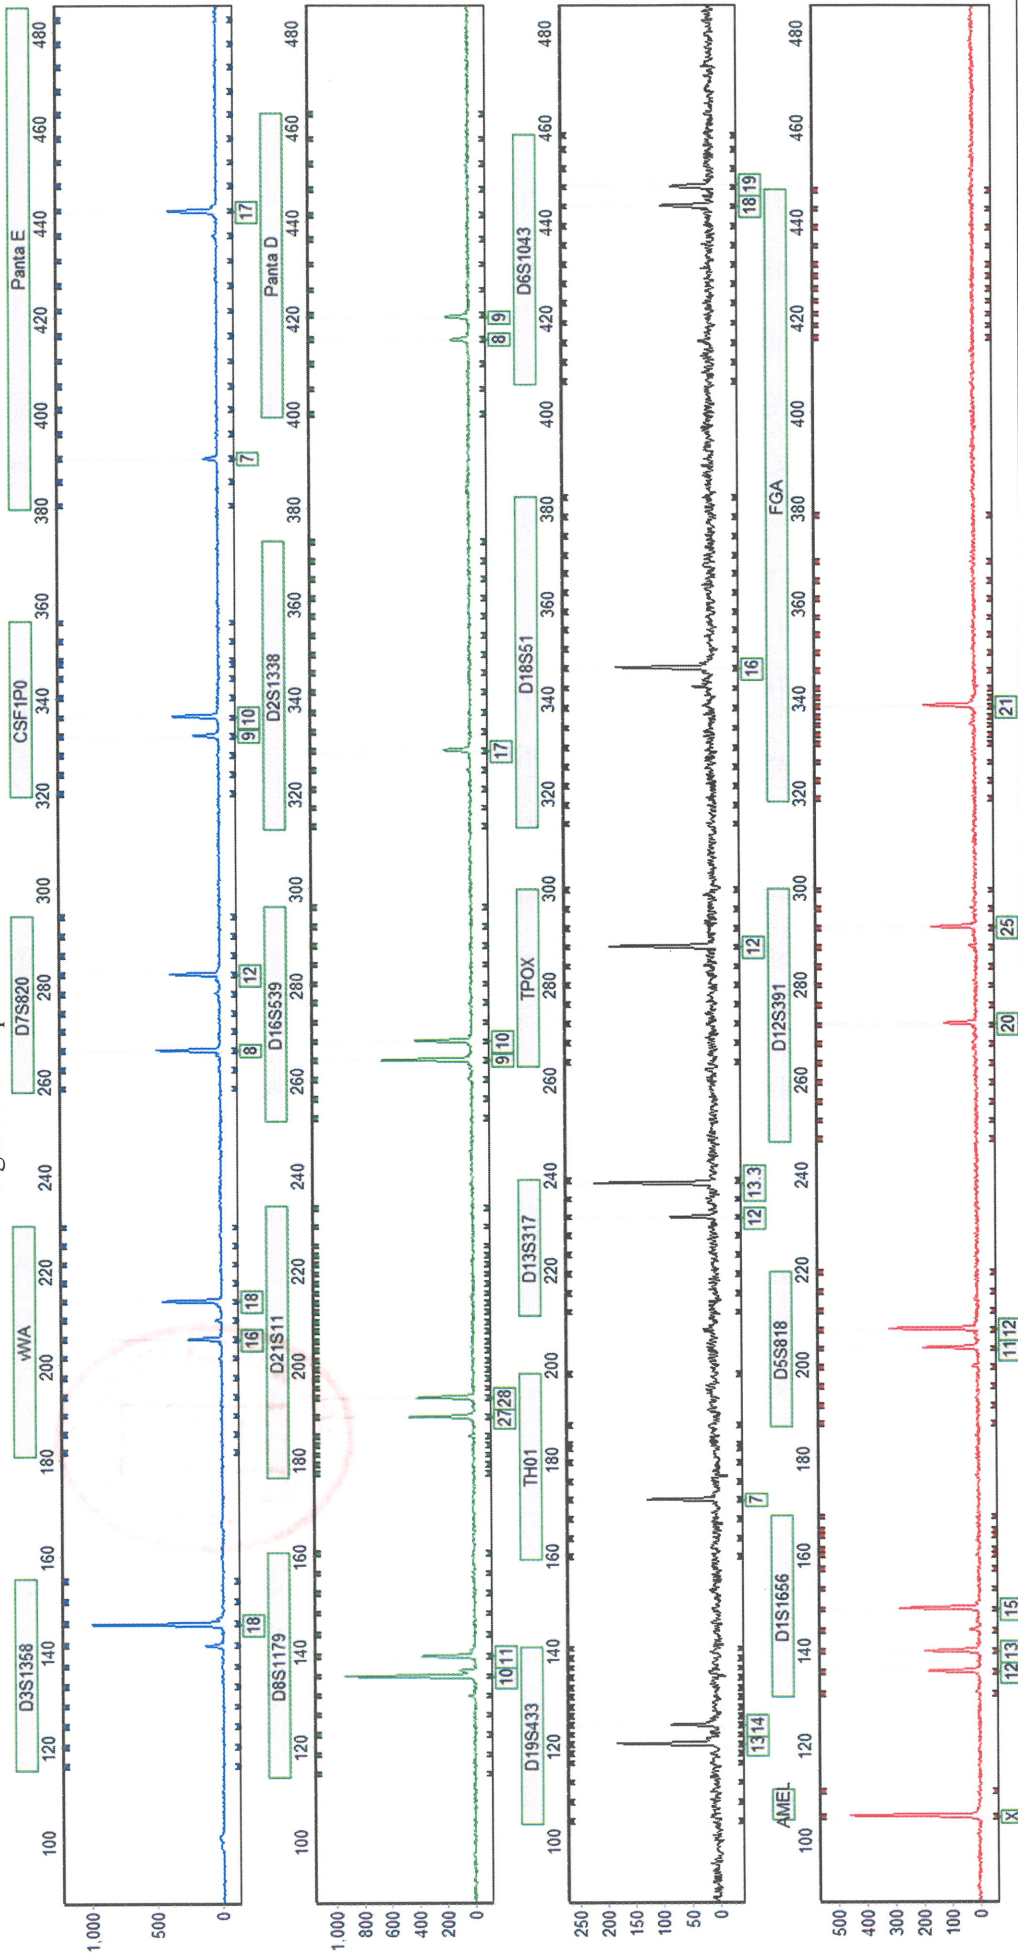

2020  
 PROFILING  
 SS  
 BIOTECH CO., LTD

Table 1. STR profiles of HeLa cell line

| 21      | Allele1 | Allele2 | Allele3 |
|---------|---------|---------|---------|
| D3S1358 | 18      |         |         |
| vWA     | 16      | 18      |         |
| D7S820  | 8       | 12      |         |
| CSF1PO  | 9       | 10      |         |
| Penta E | 7       | 17      |         |
| D8S1179 | 10      | 11      |         |
| D21S11  | 27      | 28      |         |
| D16S539 | 9       | 10      |         |
| D2S1338 | 17      |         |         |
| Penta D | 8       | 9       |         |
| D19S433 | 13      | 14      |         |
| TH01    | 7       |         |         |
| D13S317 | 12      | 13, 3   |         |
| TPOX    | 12      |         |         |
| D18S51  | 16      |         |         |
| D6S1043 | 18      | 19      |         |
| AMEL    | X       |         |         |
| D1S1656 | 12      | 13      | 15      |
| D5S818  | 11      | 12      |         |
| D12S391 | 20      | 25      |         |
| FGA     | 21      |         |         |

Figure 2. Search result in ATCC database

## SEARCH THE STR DATABASE

As part of our continuing efforts to characterize and authenticate the cell lines in the Cell Biology collection, ATCC has developed a comprehensive database of short tandem repeat (STR) DNA profiles for all of our human cell lines. [View our brief tutorial before starting.](#)

1. [STR Profiling Analysis](#)
2. [Matching Algorithm](#)
3. [Interrogating the Database](#)

Showing 1 - 19 Of 19

PageSize: 100 ▾

| Add to Cart              | %Match | ATCC® Number | Designation                      | D5S818 | D13S317 | D7S820 | D16S539 | vWA   | TH01 | AMEL | TPOX | CSF1PO |
|--------------------------|--------|--------------|----------------------------------|--------|---------|--------|---------|-------|------|------|------|--------|
| <input type="checkbox"/> | 94.0   | CCL-2        | HeLaCervical AdenocarcinomaHuman | 11,12  | 12,13.3 | 8,12   | 9,10    | 16,18 | 7    | X    | 8,12 | 9,10   |
| <input type="checkbox"/> | 94.0   | CCL-5        | L132Cervical carcinomaHuman      | 11,12  | 12,13.3 | 8,12   | 9,10    | 16,18 | 7    | X    | 8,12 | 9,10   |

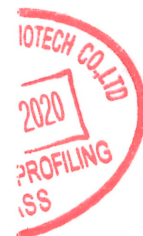



Figure 3. Search result in DSMZ database

**Result of STR matching analysis by your data.**  
- DSMZ Profile Database -

A graphical presentation is shown at the bottom of this page.

| EV          | Cell No.   | Cell name                | Locus names |         |        |         |       |      |     |       |        | Figures |
|-------------|------------|--------------------------|-------------|---------|--------|---------|-------|------|-----|-------|--------|---------|
|             |            |                          | D5S818      | D13S317 | D7S820 | D16S539 | VWA   | TH01 | AM  | TPOX  | CSF1PO |         |
|             |            | <i>Query (Your Cell)</i> | 11,12       | 12,13.3 | 8,12   | 9,10    | 16,18 | 7,7  | x,x | 12,12 | 9,10   |         |
| 1.00(36/36) | JCRB0649.1 | HeLa.P3                  | 11,12       | 12,13.3 | 8,12   | 9,10    | 16,18 | 7,7  | X,X | 12,12 | 9,10   | -       |
| 0.94(34/36) | 57         | HELA                     | 11,12       | 12,13.3 | 8,12   | 9,10    | 16,18 | 7,7  | X,X | 8,12  | 9,10   | -       |
| 0.94(34/36) | 57         | HELA                     | 11,12       | 12,13.3 | 8,12   | 9,10    | 16,18 | 7,7  | X,X | 8,12  | 9,10   | -       |
| 0.94(34/36) | 116        | GIRARDI HEART C2         | 11,12       | 12,13.3 | 8,12   | 9,10    | 16,18 | 7,7  | X,X | 8,12  | 9,10   | -       |
| 0.94(34/36) | 121        | GIRARDI HEART C7         | 11,12       | 12,13.3 | 8,12   | 9,10    | 16,18 | 7,7  | X,X | 8,12  | 9,10   | -       |
| 0.94(34/36) | 136        | KB                       | 11,12       | 12,13.3 | 8,12   | 9,10    | 16,18 | 7,7  | X,X | 8,12  | 9,10   | -       |
| 0.94(34/36) | 149        | KB-V1                    | 11,12       | 12,13.3 | 8,12   | 9,10    | 16,18 | 7,7  | X,X | 8,12  | 9,10   | -       |
| 0.94(34/36) | 158        | KB-3-1                   | 11,12       | 12,13.3 | 8,12   | 9,10    | 16,18 | 7,7  | X,X | 8,12  | 9,10   | -       |
| 0.94(34/36) | 161        | HELA-S3                  | 11,12       | 12,13.3 | 8,12   | 9,10    | 16,18 | 7,7  | X,X | 8,12  | 9,10   | -       |
| 0.94(34/36) | CCL-17     | KB                       | 11,12       | 12,13.3 | 8,12   | 9,10    | 16,18 | 7,7  | X,X | 8,12  | 9,10   | -       |
| 0.94(34/36) | CCL-2      | HeLa                     | 11,12       | 12,13.3 | 8,12   | 9,10    | 16,18 | 7,7  | X,X | 8,12  | 9,10   | -       |

Figure 4. Authentication of the species of the sample

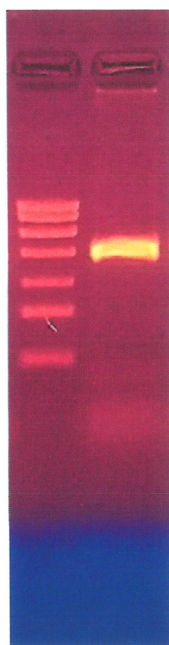

M: Marker. As the size of 700, 600, 500, 400, 300, 200 and 100bp from up to down.

Nine species are checked, as follow: *Homo sapiens* 391bp, *Cricetulus griseus* 315bp, *Macaca mulatta* 287bp, *Cercopithecus aethiops* 222bp, *Rattus norvegicus* 196bp, *Canis familiaris* 172bp, *Mus musculus* 150bp, *Bos Taurus* 102bp, IC 70bp

The sample: The band size is 391bp which matches the size of human.

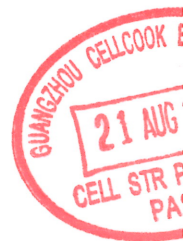

Supplement: mmc2.pdf [file mmc2.pdf]
